# Supplementary material for: Combination of circulating miR-145-5p/miR-191-5p as biomarker for breast cancer detection
Source: PeerJ. 2020 Dec 16;8:e10494. doi: 10.7717/peerj.10494 (PMC7749656; doi:10.7717/peerj.10494)
Supplement: Supplemental Information 1 [file peerj-08-10494-s001.xlsx]

## Sheet: Sheet1
#	Group	Ct miR-145-5p	Ct miR-16-5p	Ct miR-191-5p	Ct miR-21-5p	Ct miR-210-3p	Ct miR-222-3p	Ct miR-29c-3p	Ct cel-miR-39	Age	Age status	Tumor type	TNM	Stage	Lymph node status	Metastases	Grade G	Grade G (x1)	ER level	ER status	PR level	PR status	Her2/neu level	Her2 status	Ki67 level, %	Ki67 status	Menarche	Menarche status	Menopause age	Menopause status	Age of first birth	Age of first birth status	Number of children	Number of children status	Number of unsuccessful pregnancies	Number of unsuccessful pregnancies status	Alcohol	Family history of cancer
1	BC	32.5537	25.171	29.0143	28.4123	34.3517	30.4065	35.914	18.8837	77	>=50	Encapsulated Papillary Carcinoma	T2N0M0	T2	N0	M0	2	2	8	ER+	8	PR+	NA		3	Low (<20)	15	late	50	post	19	<=22	10	>2	2	>0	no	no
2	BC	28.8123	19.5273	24.7293	23.4797	29.599	27.0667	31.511	16.907	50	>=50	Mucinous carcinoma	T2NxM0	T2		M0	2	2	8	ER+	8	PR+	0	HER-	15	Low (<20)	16	late	42	post	21	<=22	3	>2	4	>0	yes	no
3	BC	29.672	21.5393	26.919	27.9283	31.9333	28.9303	34.2077	18.4137	71	>=50	Invasive carcinoma	T2N0M0	T2	N0	M0	2	2	8	ER+	8	PR+	0	HER-	14	Low (<20)	16	late	50	post	22	<=22	3	>2	0	0	no	no
4	BC	28.0863	21.3393	24.127	25.631	31.065	26.4223	31.457	18.9207	73	>=50	Infiltrating carcinama	T2N0M0	T2	N0	M0	2	2	7	ER+	7	PR+	0	HER-	15	Low (<20)	15	late	50	post	32	>22	3	>2	1	>0	no	no
5	BC	29.353	23.142	25.565	28.2157	32.587	28.29	34.4923	19.68	66	>=50	Infiltrating carcinama	T2N0M0	T2	N0	M0	2	2	8	ER+	5	PR+	0	HER-	14	Low (<20)	14	early	45	post	23	>22	3	>2	15	>0	yes	yes
6	BC	27.8553	20.9327	24.6893	25.7703	31.807	27.1797	31.3773	18.9027	62	>=50	Infiltrating carcinama	T2NxM0	T2		M0	2	2	7	ER+	1	PR-	0	HER-	12	Low (<20)	15	late	49	post	25	>22	6	>2	0	0	no	no
7	BC	31.2357	25.4277	28.2233	29.6557	35.9243	30.6143	36.1117	22.1453	56	>=50	Infiltrating carcinama	T1N0M0	T1	N0	M0	2	2	5	ER+	4	PR+	0	HER-	16	Low (<20)	13	early	54	post	25	>22	3	>2	1	>0	no	yes
8	BC	30.9807	22.9957	27.7697	27.9857	33.0043	29.7547	35.5323	18.7843	49	<50	Infiltrating carcinama	T2N0M0	T2	N0	M0	3	3	8	ER+	8	PR+	0	HER-	35	High	13	early	no	pre	22	<=22	2	<=2	4	>0	no	yes
9	BC	32.4483	25.4633	28.3503	31.266	33.683	30.7433	37.4603	21.7693	36	<50	Infiltrating carcinama	T2N0M0	T2	N0	M0	2	2	8	ER+	5	PR+	0	HER-	15	Low (<20)	17	late	no	pre	20	<=22	5	>2	1	>0	no	no
10	BC	29.1703	22.3777	26.3523	26.161	31.641	28.6997	32.69	18.2353	52	>=50	Infiltrating carcinama	T1N0M0	T1	N0	M0	2	2	8	ER+	8	PR+	1	HER-	13	Low (<20)	14	early	49	post	29	>22	1	<=2	4	>0	no	yes
11	BC	28.102	21.1083	24.8947	25.062	30.6783	26.8807	31.9663	17.934	48	<50	Infiltrating carcinama	T2N0M0	T2	N0	M0	2	2	8	ER+	4	PR+	1	HER-	10	Low (<20)	15	late	no	pre	20	<=22	3	>2	3	>0	no	no
12	BC	27.5393	21.0337	24.499	24.0793	30.8187	26.726	31.6407	17.3153	48	<50	Infiltrating carcinama	T2N0M0	T2	N0	M0	2	2	8	ER+	5	PR+	1	HER-	35	High	13	early	no	pre	22	<=22	3	>2	1	>0	no	no
13	BC	29.588	22.954	26.282	25.4933	31.6417	28.2	33.899	18.81	68	>=50	Infiltrating carcinama	T2NxM0	T2		M0	2	2	0	ER-	3	PR+	1	HER-	12	Low (<20)	13	early	58	post	20	<=22	5	>2	0	0	no	no
14	BC	27.6073	20.6167	24.43	23.974	30.804	26.928	31.8163	17.8263	19	<50	Infiltrating carcinama	T2NxM0	T2		M0	2	2	0	ER-	0	PR-	0	HER-	50	High	13	early	no	pre	no		no		0	0	no	no
15	BC	27.081	21.3653	24.9963	24.5133	31.372	26.789	32.2353	17.7623	60	>=50	Infiltrating carcinama	T2N0M0	T2	N0	M0	2	2	6	ER+	4	PR+	3	HER+	10	Low (<20)	13	early	38	post	23	>22	3	>2	2	>0	no	no
16	BC	29.4803	23.1567	28.5687	27.3413	32.4317	30.4423	35.5073	19.1667	40	<50	Infiltrating carcinama	T2N0M0	T2	N0	M0	2	2	3	ER+	2	PR-	0	HER-	80	High	13	early	no	pre	21	<=22	3	>2	2	>0	no	no
17	BC	29.794	22.137	26.2603	25.333	32.69	28.266	33.4923	17.7937	56	>=50	Infiltrating carcinama	T2N0M0	T2	N0	M0	2	2	8	ER+	8	PR+	0	HER-	70	High	12	early	50	post	23	>22	3	>2	0	0	yes	no
18	BC	28.697	20.6833	26.0813	24.9727	30.6903	28.5827	33.2627	17.5303	48	<50	Infiltrating carcinama	T2N1M0	T2	N1-3	M0	3	3	2	ER-	4	PR+	1	HER-	45	High	14	early	no	pre	23	>22	4	>2	0	0	no	no
19	BC	30.8093	24.8953	30.0113	27.7753	33.1423	30.8597	36.1883	19.3553	60	>=50	Infiltrating carcinama	T2N0M0	T2	N0	M0	3	3	8	ER+	8	PR+	0	HER-	7	Low (<20)	14	early	48	post	22	<=22	3	>2	2	>0	no	no
20	BC	28.0917	22.6693	27.7037	25.7017	31.7123	28.759	33.765	18.2213	51	>=50	Infiltrating carcinama	T2N0M0	T2	N0	M0	3	3	8	ER+	6	PR+	3	HER+	50	High	13	early	no	pre	26	>22	1	<=2	0	0	no	no
21	BC	31.6007	24.643	29.3207	27.466	33.2223	30.8997	35.2843	19.263	47	<50	Infiltrating carcinama	T2N0M0	T2	N0	M0	2	2	8	ER+	0	PR-	0	HER-	20	High	13	early	no	pre	22	<=22	2	<=2	0	0	no	no
22	BC	31.0583	22.817	27.7003	27.233	32.5637	30.1977	34.9887	18.6993	55	>=50	Infiltrating carcinama	T1N0M0	T1	N0	M0	3	3	7	ER+	5	PR+	1	HER-	6	Low (<20)	13	early	54	post	25	>22	2	<=2	0	0	no	no
23	BC	29.3587	21.7063	27.077	25.696	31.428	28.748	33.894	18.668	55	>=50	Infiltrating carcinama	T2N0M0	T2	N0	M0	2	2	7	ER+	5	PR+	1	HER-	35	High	13	early	50	post	24	>22	1	<=2	1	>0	no	no
24	BC	31.5077	24.3197	29.2157	26.9847	34.025	30.294	35.1877	17.688	51	>=50	Infiltrating carcinama	T2N0M0	T2	N0	M0	2	2	8	ER+	8	PR+	1	HER-	45	High	14	early	50	post	20	<=22	2	<=2	2	>0	no	no
25	BC	29.893	22.4707	26.0917	25.495	32.6427	28.127	33.3177	18.0937	64	>=50	Infiltrating carcinama	T2N0M0	T2	N0	M0	2	2	2	ER-	0	PR-	0	HER-	25	High	13	early	54	post	20	<=22	2	<=2	1	>0	no	no
26	BC	28.7723	22.5463	25.7213	24.904	31.89	27.7157	33.2583	18.5797	46	<50	Intraductal carcinoma	T2N0M0	T2	N0	M0	2	2	3	ER+	0	PR-	0	HER-	20	High	16	late	no	pre	19	<=22	3	>2	4	>0	no	no
27	BC	26.8697	20.717	23.2987	22.364	30.4507	25.557	30.4717	17.5053	58	>=50	Infiltrating carcinama	T1N0M0	T1	N0	M0	2	2	8	ER+	4	PR+	1	HER-	8	Low (<20)	13	early	51	post	22	<=22	2	<=2	2	>0	no	no
28	BC	26.621	18.9743	24.0097	22.903	30.077	25.7753	29.864	16.602	54	>=50	Infiltrating carcinama	T2N0M0	T2	N0	M0	1		0	ER-	0	PR-	3	HER+	60	High	12	early	45	post	30	>22	1	<=2	1	>0	yes	yes
29	BC	30.454	23.5653	27.846	27.0437	33.814	29.8237	35.3303	18.284	53	>=50	Infiltrating carcinama	T4N3M1	T4	N1-3	M1	2	2	4	ER+	3	PR+	3	HER+	20	High	13	early	50	post	23	>22	3	>2	1	>0	no	yes
30	BC	29.731	23.747	27.2227	26.4383	32.2143	28.8623	35.034	18.5643	55	>=50	Infiltrating carcinama	T2N1M0	T2	N1-3	M0	2	2	8	ER+	3	PR+	0	HER-	18	Low (<20)	12	early	52	post	21	<=22	2	<=2	1	>0	no	yes
31	BC	30.69	24.1443	28.2603	26.4273	33.6727	29.7073	34.3283	18.5323	45	<50	Invasive carcinoma	T2N1M0	T2	N1-3	M0	2	2	0	ER-	0	PR-	3	HER+	30	High	13	early	no	pre	39	>22	1	<=2	0	0	no	no
32	BC	31.232	24.7387	28.7263	27.6443	34.151	30.179	35.6313	19.438	52	>=50	Infiltrating carcinama	T3NxM0	T3		M0	2	2	3	ER+	4	PR+	1	HER-	14	Low (<20)	12	early	48	post	23	>22	2	<=2	4	>0	no	no
33	BC	29.3887	23.8077	27.5977	26.6827	32.88	29.2367	34.503	18.643	44	<50	Infiltrating carcinama	T2N1M0	T2	N1-3	M0	3	3	0	ER-	0	PR-	0	HER-	80	High	13	early	no	pre	22	<=22	4	>2	1	>0	no	no
34	BC	29.389	23.7843	27.764	26.579	33.1517	29.1357	34.9283	18.5643	31	<50	Invasive carcinoma	T3N2M0	T3	N1-3	M0	2	2	0	ER-	0	PR-	3	HER+	45	High	13	early	no	pre	no		no		0	0	no	no
35	BC	29.6057	24.6137	27.406	25.8583	33.2067	29.0187	34.737	18.7903	41	<50	Infiltrating carcinama	T2N2M0	T2	N1-3	M0	2	2	3	ER+	3	PR+	3	HER+	50	High	13	early	no	pre	23	>22	4	>2	2	>0	no	yes
36	Control	33.43	24.0267	29.0453	28.589	32.492	30.321	34.932	19.3577	59	>=50																13	early	54	post	25	>22	4	>2	2	>0	yes	no
37	Control	31.5843	24.8137	30.486	29.044	34.2583	30.3323	35.624	18.695	65	>=50																16	late	46	post	22	<=22	7	>2	3	>0	no	yes
38	Control	33.5433	23.5077	28.8727	28.289	32.8737	30.0713	35.2703	19.2033	56	>=50																12	early	46	post	20	<=22	1	<=2	2	>0	no	no
39	Control	35.673	28.054	31.5387	31.535	35.706	32.6277	37.4633	20.4057	43	<50																15	late	no	pre	19	<=22	3	>2	1	>0	yes	no
40	Control	33.9967	25.1173	30.1813	29.2817	34.304	30.6077	36.1383	19.7267	67	>=50																14	early	52	post	31	>22	3	>2	0	0	no	yes
41	Control	34.3547	25.1727	31.041	29.1973	34.407	31.6137	37.013	19.828	71	>=50																16	late	48	post	27	>22	1	<=2	1	>0	no	no
42	Control	32.1417	24.209	29.0147	28.0145	33.2483	29.661	34.7233	18.3523	45	<50																12	early	no	pre	18	<=22	3	>2	6	>0	no	no
43	Control	32.9587	23.9283	29.5883	28.532	34.01	30.7163	35.5643	19.652	71	>=50																16	late	50	post	19	<=22	5	>2	4	>0	yes	no
44	Control	31.9803	24.4703	29.586	28.2243	34.4207	30.3233	35.085	18.436	51	>=50																15	late	no	pre	27	>22	3	>2	0	0	no	yes
45	Control	32.65	24.6967	29.4607	28.1297	34.466	30.026	35.6417	18.542	50	>=50																16	late	no	pre	25	>22	4	>2	2	>0	yes	no
46	Control	31.9177	23.7313	29.036	27.901	34.145	29.9367	35.2577	18.4977	56	>=50																13	early	46	post	22	<=22	3	>2	1	>0	no	yes
47	Control	32.9603	24.8083	29.7507	28.8477	34.6657	30.5137	35.3347	18.9943	49	<50																15	late	no	pre	20	<=22	3	>2	3	>0	no	no
48	Control	31.936	24.0193	28.4597	27.755	33.4427	29.6453	35.0633	18.7517	55	>=50																14	early	46	post	20	<=22	4	>2	3	>0	no	no
49	Control	32.1997	21.8823	28.639	27.081	31.6813	29.2967	34.4413	18.444	44	<50																15	late	no	pre	21	<=22	3	>2	0	0	no	no
50	Control	33.09	25.6867	30.947	30.0383	35.2073	31.6473	36.6663	20.1523	47	<50																16	late	no	pre	23	>22	4	>2	1	>0	no	no
51	Control	34.3943	25.002	30.6193	29.4523	34.8747	31.107	36.543	19.8997	56	>=50																13	early	52	post	31	>22	1	<=2	1	>0	no	yes
52	Control	33.037	24.858	30.0247	28.856	34.043	30.696	36.1883	19.475	58	>=50																13	early	43	post	27	>22	2	<=2	2	>0	no	no
53	Control	33.103	25.6953	30.1833	29.04	34.5283	31.094	36.7977	20.118	46	<50																16	late	no	pre	20	<=22	3	>2	1	>0	no	no
54	Control	34.125	25.7763	31.0927	29.1243	34.8297	31.2503	36.496	20.1357	52	>=50																17	late	50	post	24	>22	2	<=2	2	>0	yes	yes
55	Control	32.4033	23.085	29.042	27.6763	33.0553	29.621	34.8257	19.0463	58	>=50																15	late	54	post	29	>22	5	>2	0	0	no	yes
56	Control	30.8037	23.1497	27.7703	27.1333	32.9557	28.9503	34.0867	18.6267	48	<50																17	late	no	pre	21	<=22	2	<=2	3	>0	yes	no
57	Control	31.8703	23.5153	28.3107	27.9193	32.839	29.8667	35.1483	19.5607	47	<50																16	late	45	post	18	<=22	3	>2	3	>0	no	yes
58	Control	32.1897	22.4397	28.0567	27.3773	32.5193	29.3727	34.424	18.5387	51	>=50																14	early	36	post	22	<=22	3	>2	2	>0	no	no
59	Control	31.404	21.9537	27.8287	27.613	32.8707	29.4057	34.9717	18.515	54	>=50																14	early	45	post	22	<=22	3	>2	2	>0	no	no
60	Control	31.315	23.1147	28.5053	27.5307	34.136	29.9103	34.905	18.996	53	>=50																16	late	51	post	19	<=22	2	<=2	2	>0	yes	no
61	Control	31.768	21.9227	27.7757	27.2493	32.6223	29.6013	34.255	17.872	43	<50																13	early	no	pre	26	>22	2	<=2	2	>0	no	no
62	Control	31.1613	21.1047	26.66	27.1677	31.416	28.9777	33.6737	18.5117	47	<50																12	early	47	post	20	<=22	3	>2	1	>0	no	no
63	Control	31.4253	21.8687	27.4203	27.1317	31.6967	29.2897	33.9653	18.1583	45	<50																13	early	no	pre	23	>22	2	<=2	0	0	no	no
64	Control	30.585	24.14	28.4737	26.6637	33.045	29.71	34.7387	18.9473	45	<50																16	late	no	pre	22	<=22	2	<=2	1	>0	no	no
65	Control	31.7427	23.124	28.4733	26.6637	32.1967	29.8443	34.596	19.082	49	<50																15	late	no	pre	34	>22	2	<=2	0	0	no	yes
66	Control	31.308	22.11	28.2223	26.6367	32.309	29.516	34.768	18.9917	57	>=50																14	early	50	post	29	>22	2	<=2	0	0	no	no
67	Control	30.9607	23.848	28.6763	26.7913	33.326	29.8997	36.4883	19.07	53	>=50																14	early	no	pre	20	<=22	4	>2	1	>0	no	no
68	Control	31.5803	25.122	29.6523	27.7453	33.9967	30.751	36.371	20.0907	58	>=50																13	early	49	post	25	>22	2	<=2	0	0	no	no
